# Supplementary material for: Carborane polyimides, synthesis and characterization
Source: Royal Society of Chemistry journal article supplement (doi:10.1039/c4ra09886b), 2014-10-08
Supplement: c4ra09886b1.pdf [file c4ra09886b1.pdf]

## Carborane Polyimides, Synthesis and Characterization

Tao Xing,\* Yuhong Huang, Kai Zhang and Juying Wu

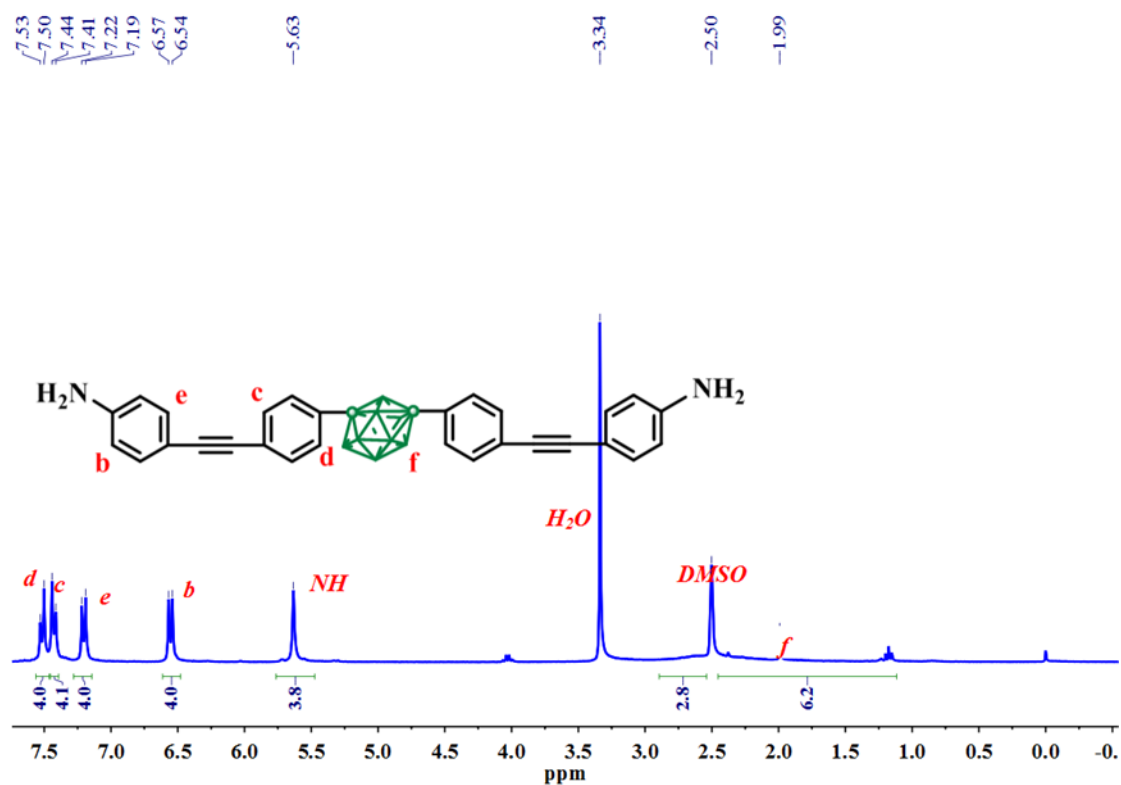

Figure S1 <sup>1</sup>H NMR spectrum of diamine 2

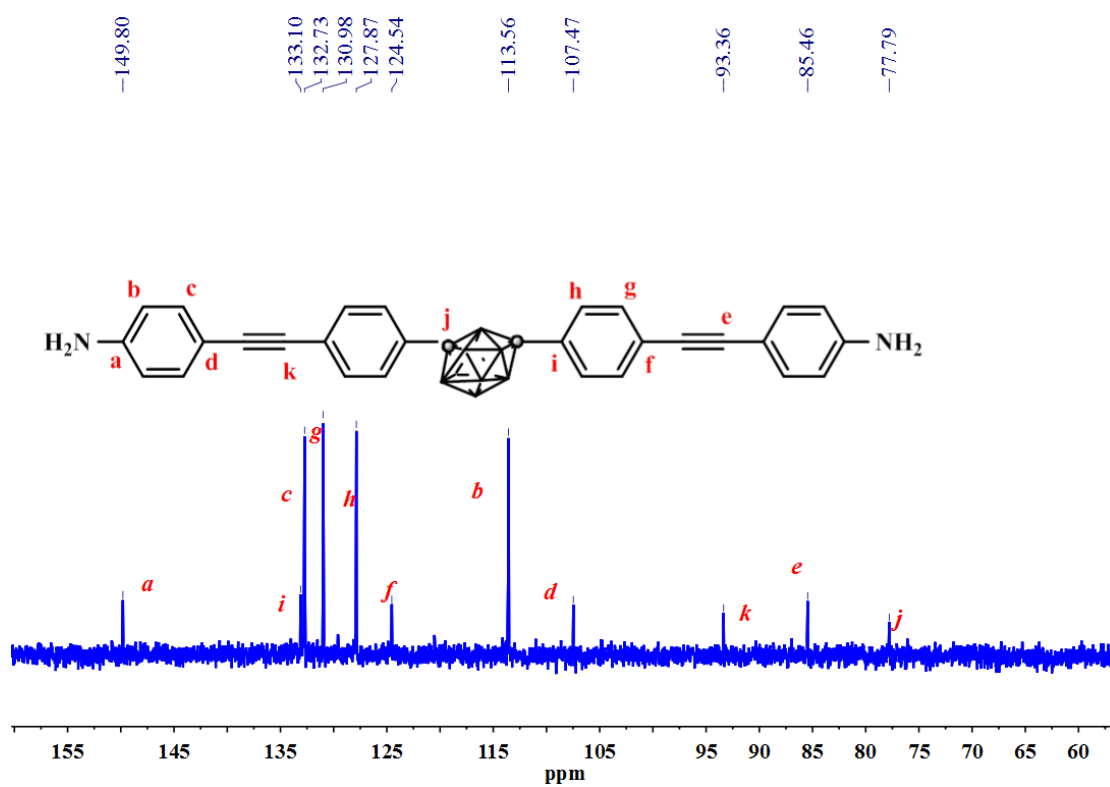

Figure S2  $^{13}\text{C}$  NMR spectrum of diamine 2

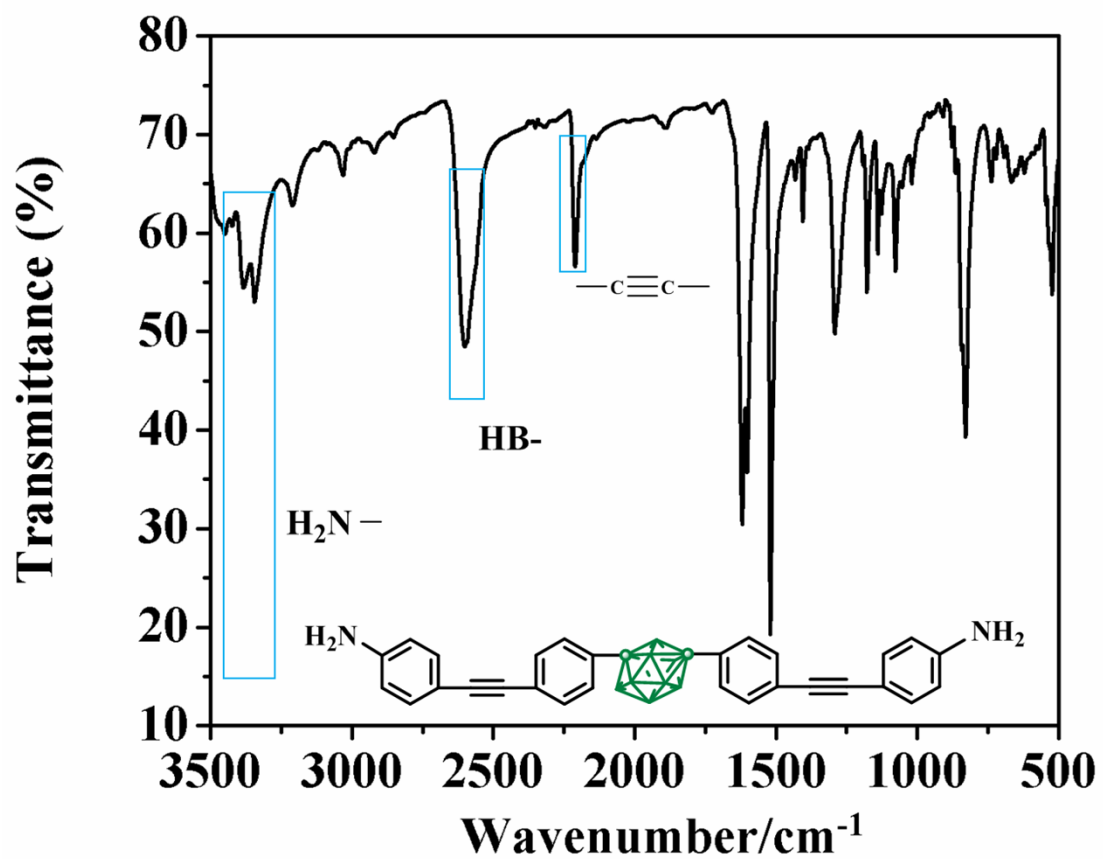

Figure S3 FT-IR spectrum of diamine 2

YJ14-1145-2 #1628-1652 RT: 13.98-14.19 AV: 25 SI 1 NL: 3.42E6  
T: + c ESI Q1 MS [450.000-650.000]

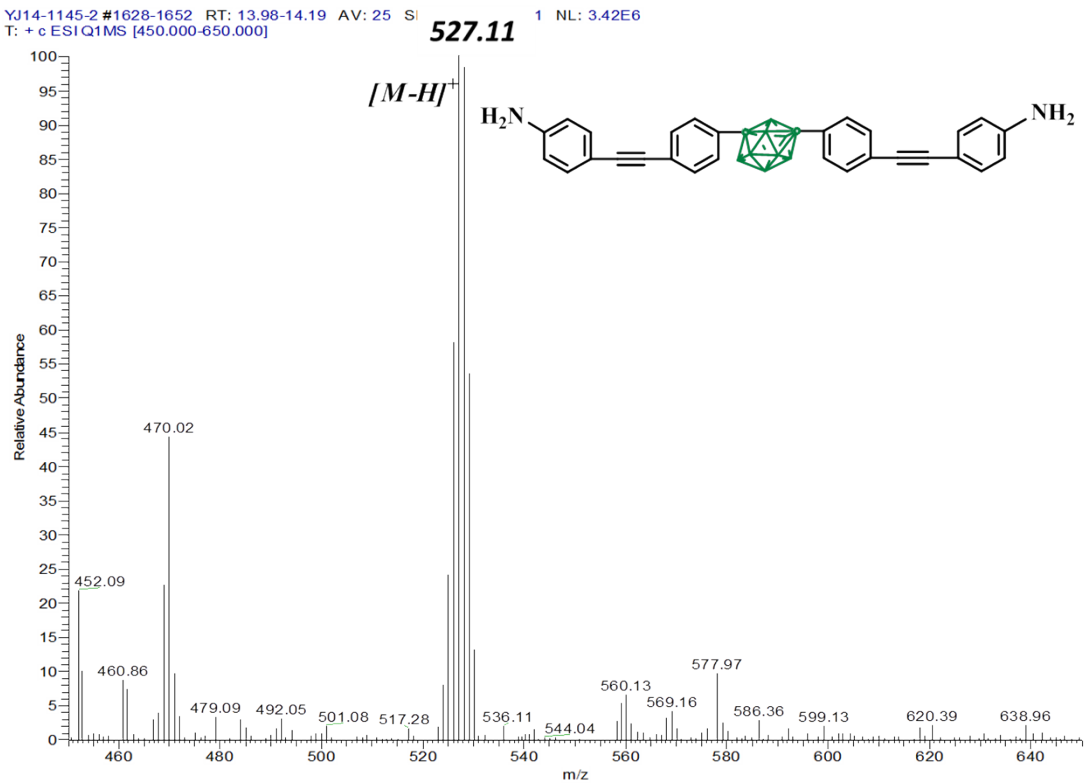

Figure S4 mass spectrum of diamine 2

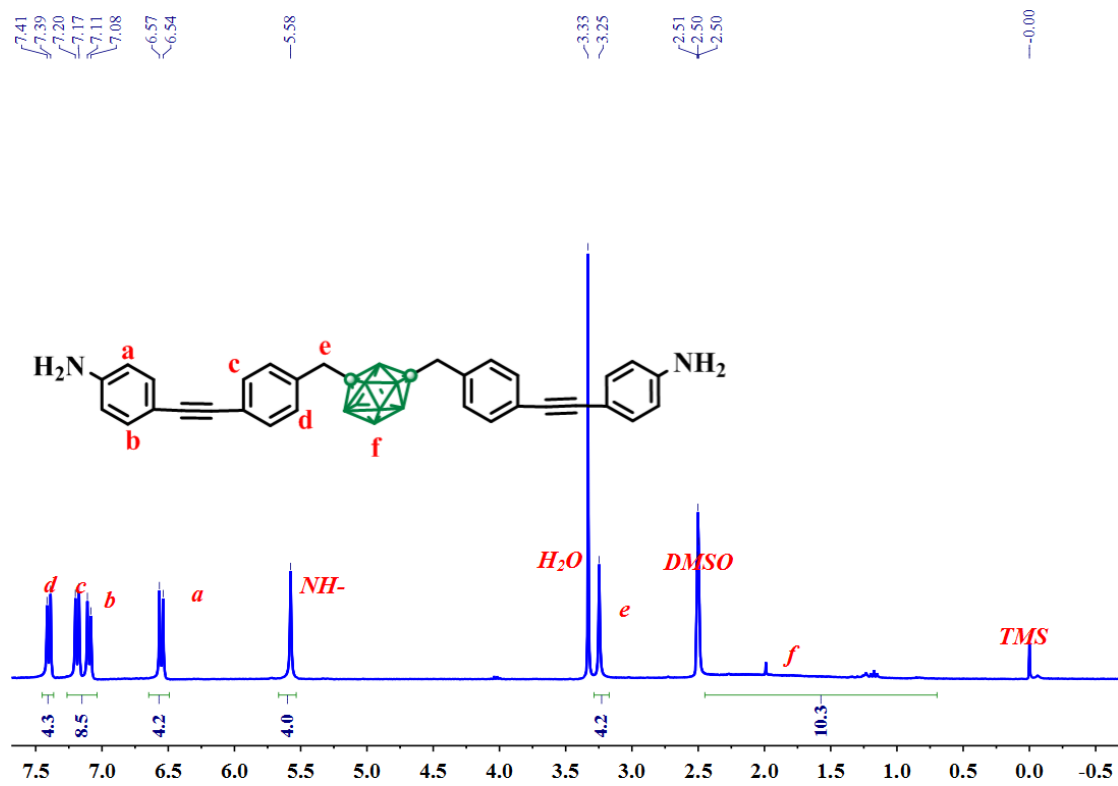

Figure S5 <sup>1</sup>H NMR spectrum of diamine 4

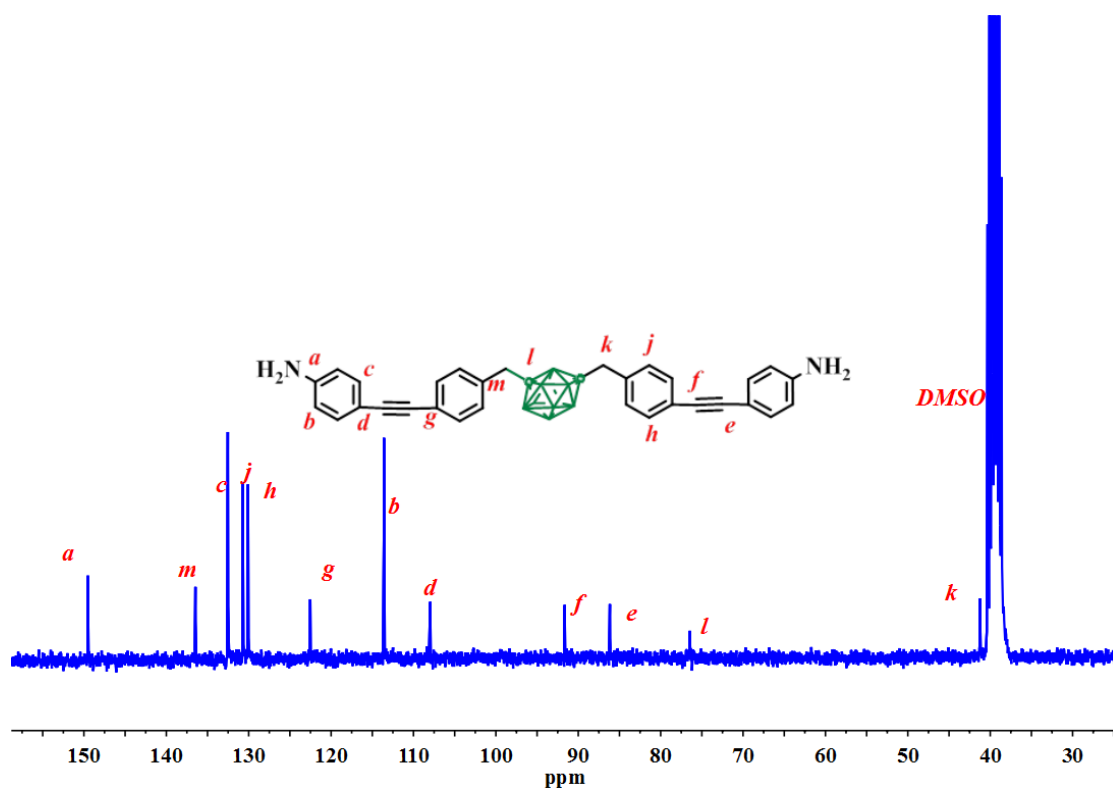

Figure S6  $^{13}\text{C}$  NMR spectrum of diamine 4

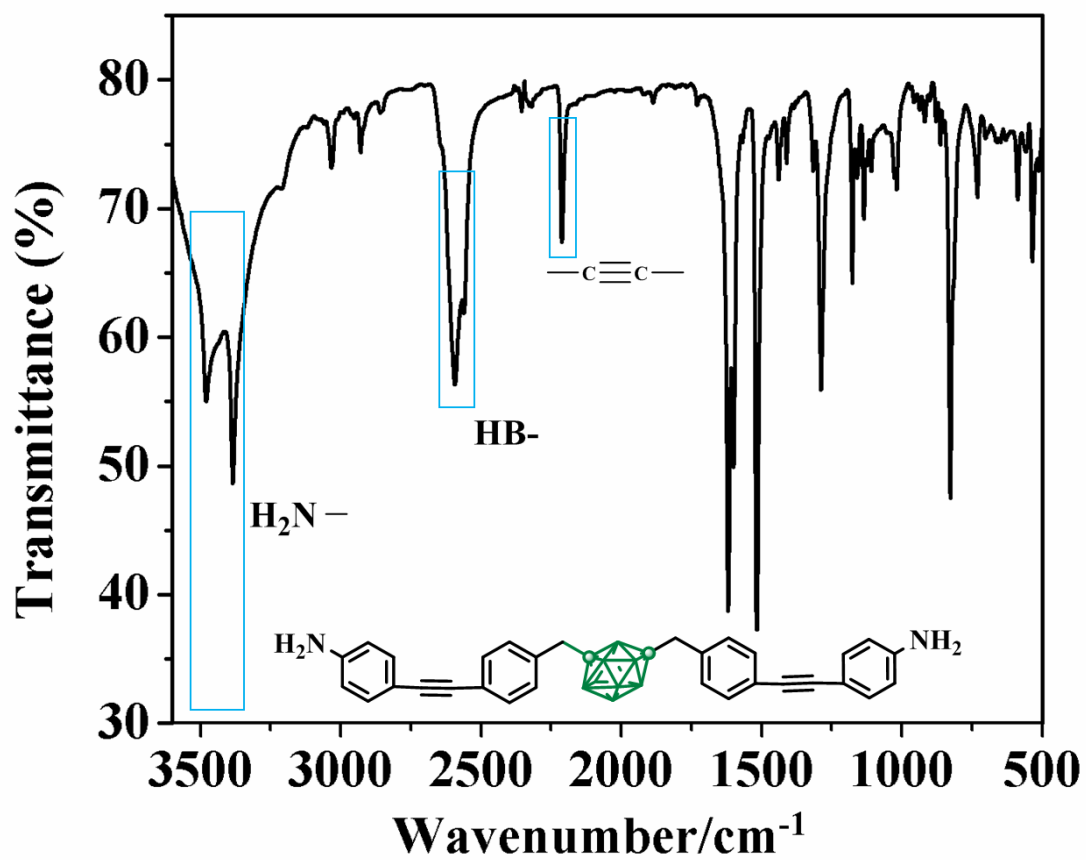

Figure S7 FT-IR spectrum of diamine 4

YJ14-1145-1\_140625103915 #191-200 RT: 1.65-1.73 AV: 10 SB: 22 0.63-0.81 NL: 5.00E6  
T: + c ESI Q1MS [450.000-650.000]

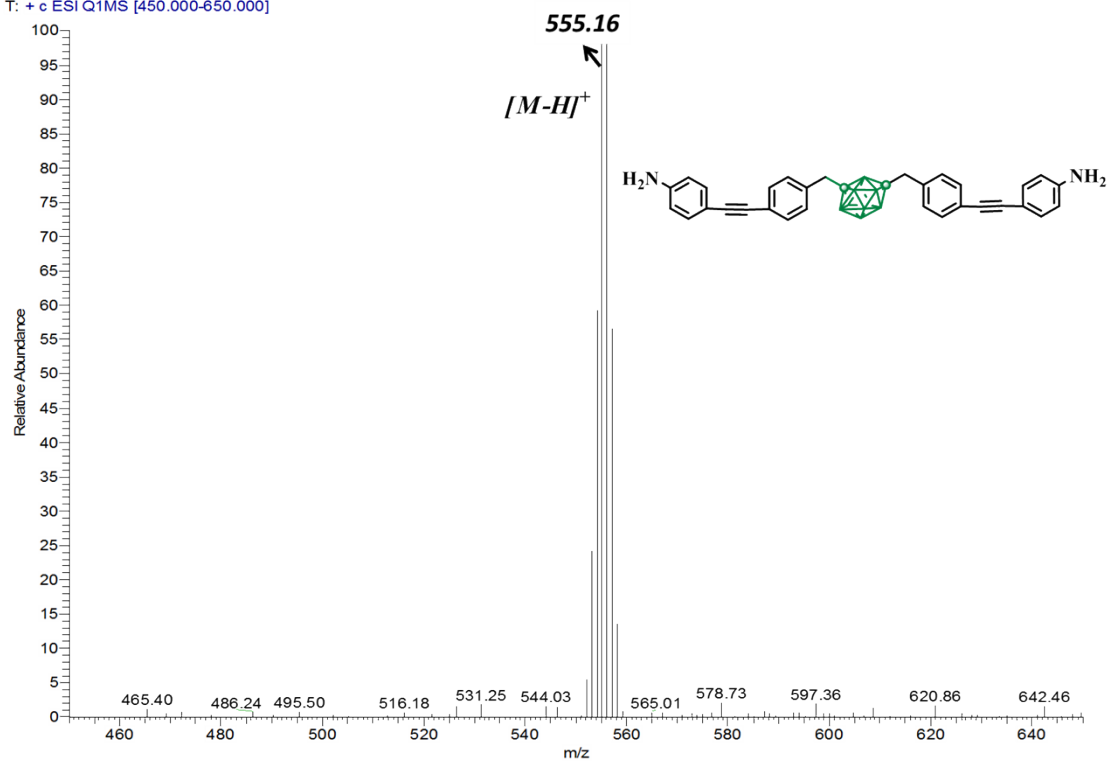

Figure S8 mass spectrum of diamine 4



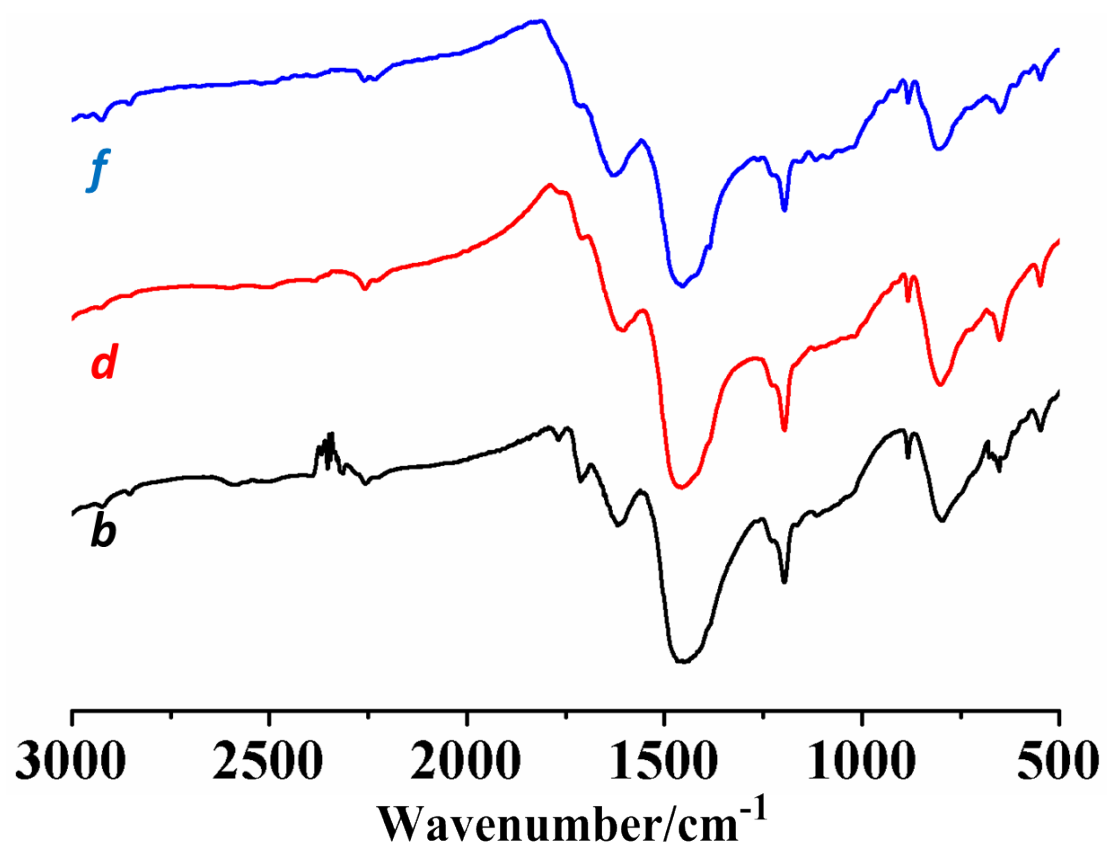

Figure S9 FT-IR spectra of polyimide *b*, *d* and *f* after heating to 500 °C and keeping at 500 °C for 3 h
